## Novel rehabilitation program after left ventricular assist device (LVAD) implantation improves functional tests and reduces levels of prognostic heart failure biomarkers

T. Chwyczo, L. Zalucka, E. Smolis-Bak, I. Kowalik, E. Noszczak, M. Bogucki, E. Piotrowicz, M. Sobieszczanska-Malek, T. Zielinski, J. Szymanski, J. Was, M. Kusmierczyk, R. Dabrowski, H. Szwed, R. Piotrowicz

National Institute of Cardiology, Warsaw, Poland

On behalf of RH-ROT

**Funding Acknowledgement:** Type of funding source: Public grant(s) – National budget only. Main funding source(s): National Center for Research and Development - STRATEGMED II project

**Background:** Rehabilitation after LVAD implantation is increasingly used. We developed the novel method of comprehensive rehabilitation starting directly after LVAD implantation.

**Study group:** 21 recent LVAD (15 Heart Mate III, 6 HeartWare) recipients (56.2±11.7 yrs, 100% men) were included to 5-week rehabilitation program, which included supervised endurance training on cycloergometer (5 times per week), resistance training, general fitness exercises with elements of equivalent and coordination exercises (every day). 6-minute walking test (6MWT), cardiopulmonary exercise test (CPET) and prognostic biomarkers: NT-proBNP, Galectin-3 and ST2 were investigated at the beginning and at the end of rehabilitation program.

**Results:** See Table 1.

At the end of rehabilitation program, significant increase in 6MWT distance, maximum workload, peak VO<sub>2</sub> and upward shift of anaerobic threshold in CPET were observed in all patients. Significant reductions of NTproBNP, ST2 and galectin-3 levels were observed. There were no major adverse events during rehabilitation.

**Conclusions:** Comprehensive novel rehabilitation in LVAD recipients is safe and results in significant improvement of 6-minutes walking test distance and cardiopulmonary exercise test results. Moreover, this novel rehabilitation program reduces levels of prognostic biomarkers of heart failure: NT-proBNP, Galectin-3 and ST2.

Results before and after rehabilitation

| Parameter                        | Before (x ± SD)  | After (x ± SD)   | Delta [95% CI]       | P       |
|----------------------------------|------------------|------------------|----------------------|---------|
| 6MWT distance (m)                | 313.5±103.2      | 433.1±94.4       | 119.6 [83.1; 156.1]  | <0.0001 |
| Max workload (Watts)             | 42.6±12.4        | 61.6±16.0        | 19.0 [14.4; 23.6]    | <0.0001 |
| pVO <sub>2</sub> (ml/kg/min)     | 11.2±2.1         | 13.2±2.4         | 2.0 [1.1; 2.9]       | 0.0002  |
| pVO <sub>2</sub> % predicted     | 39.4±11.3        | 46.4±11.5        | 7.0 [3.5; 10.6]      | 0.0006  |
| AT (ml/kg/min)                   | 9.0±1.8          | 10.8±2.1         | 1.8 [1.0; 2.6]       | 0.0002  |
| Galectin-3                       | 9.87±2.25        | 8.48±1.81        | -1.39 [-2.22; -0.56] | 0.0029  |
| ST2                              | 27.86±11.4       | 22.64±7.8        | -5.22 [-9.5; -0.92]  | 0.0205  |
| NTproBNP (pg/ml) median [Q1 –Q3] | 4350 [2620–8476] | 1201 [1048–2329] | -2621 [-4961; -1211] | <0.0001 |

6MWT, 6-minutes walking test; Max workload, maximum achieved workload on cycle ergometer; pVO<sub>2</sub>, peak oxygen uptake; pVO<sub>2</sub>% predicted, % of predicted peak oxygen uptake; AT, anaerobic threshold; NTproBNP, N-Terminal Pro-B-Type Natriuretic Peptide – medians and quartiles; Delta [95% CI], difference between the results before and after rehabilitation, 95% confidence interval is given in square brackets.
